# Supplementary material for: Evolution and Dynamic Transcriptome of Key Genes of Photoperiodic Flowering Pathway in Water Spinach (Ipomoea aquatica)
Source: MDPI journal article supplement (doi:10.3390/ijms25031420), 2024-01-24
Supplement: s1 [file s1]

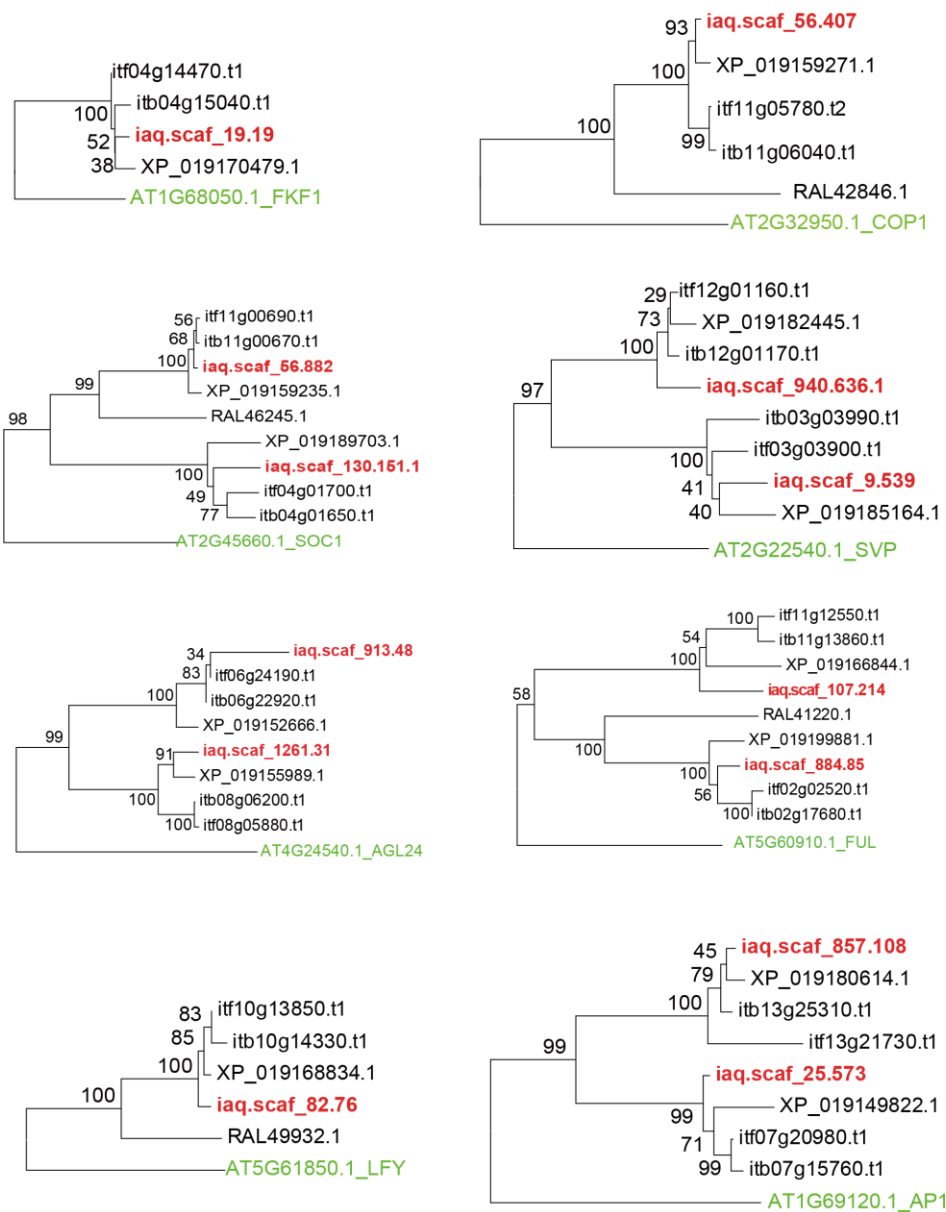

**Figure S1.** Phylogenetic analysis of different gene family in water spinach.

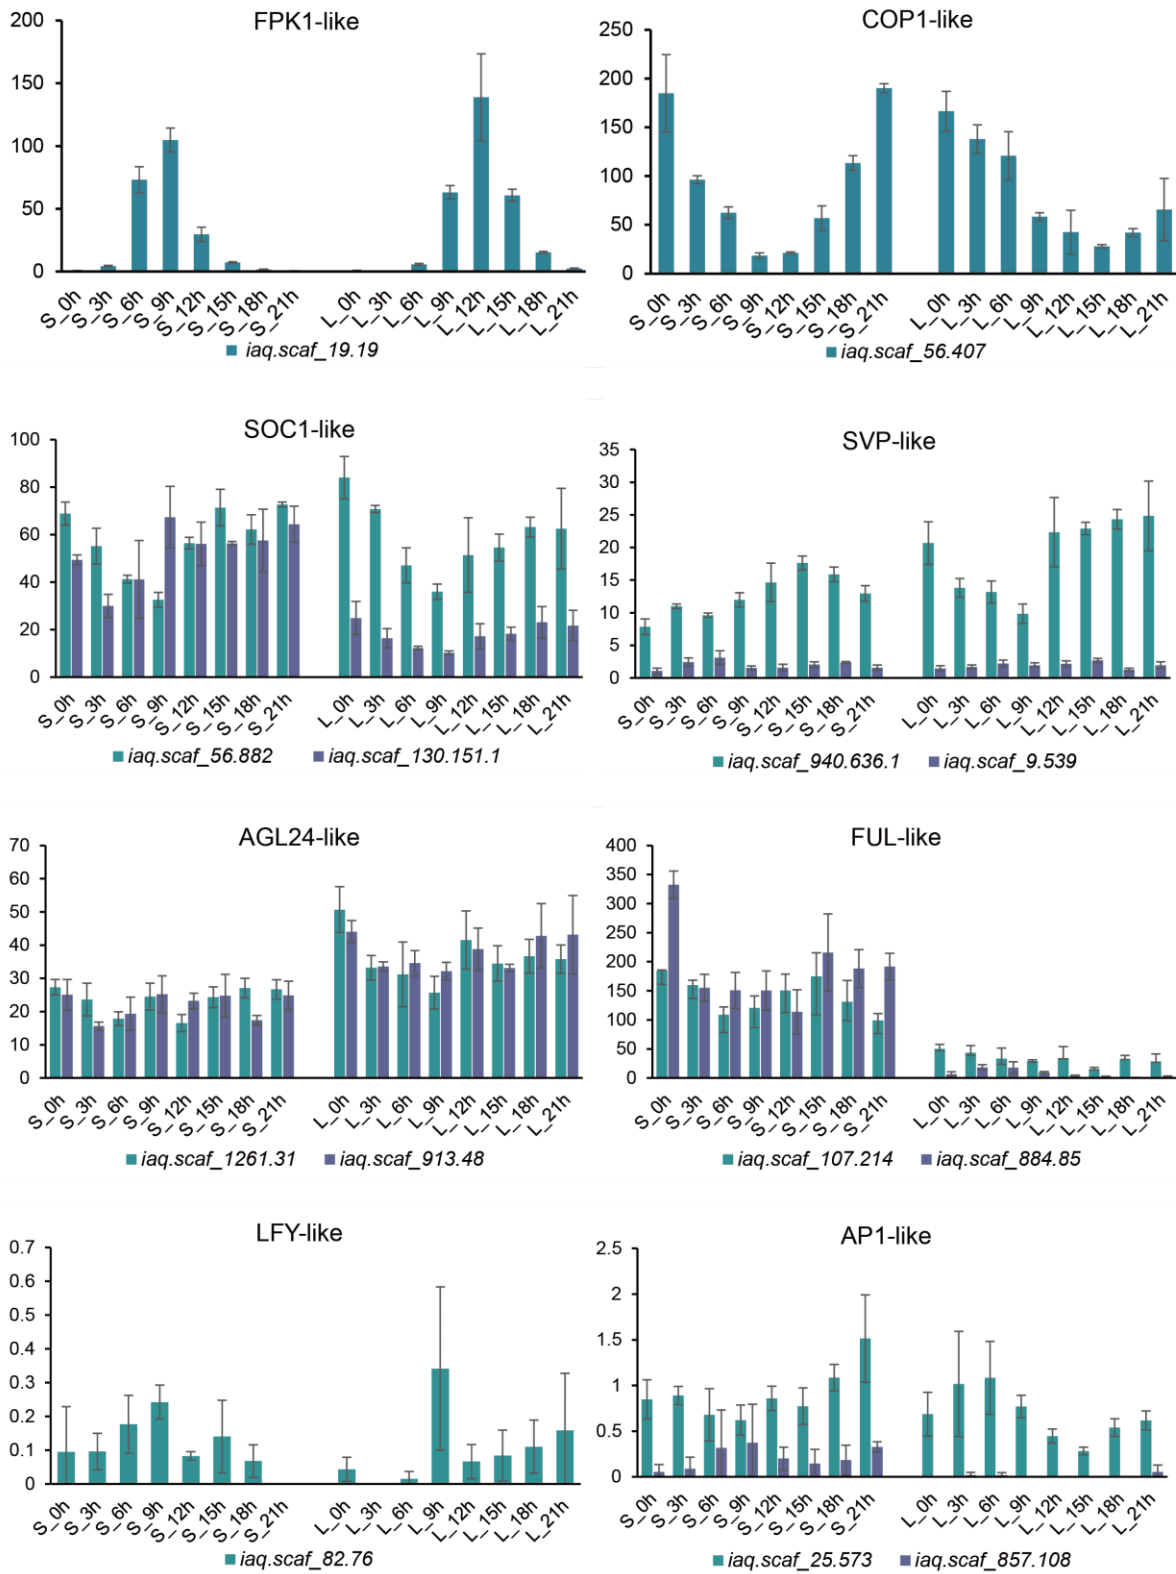

**Figure S2.** The transcript level of flowering-related genes in water spinach. S indicated short day; L indicated long day.

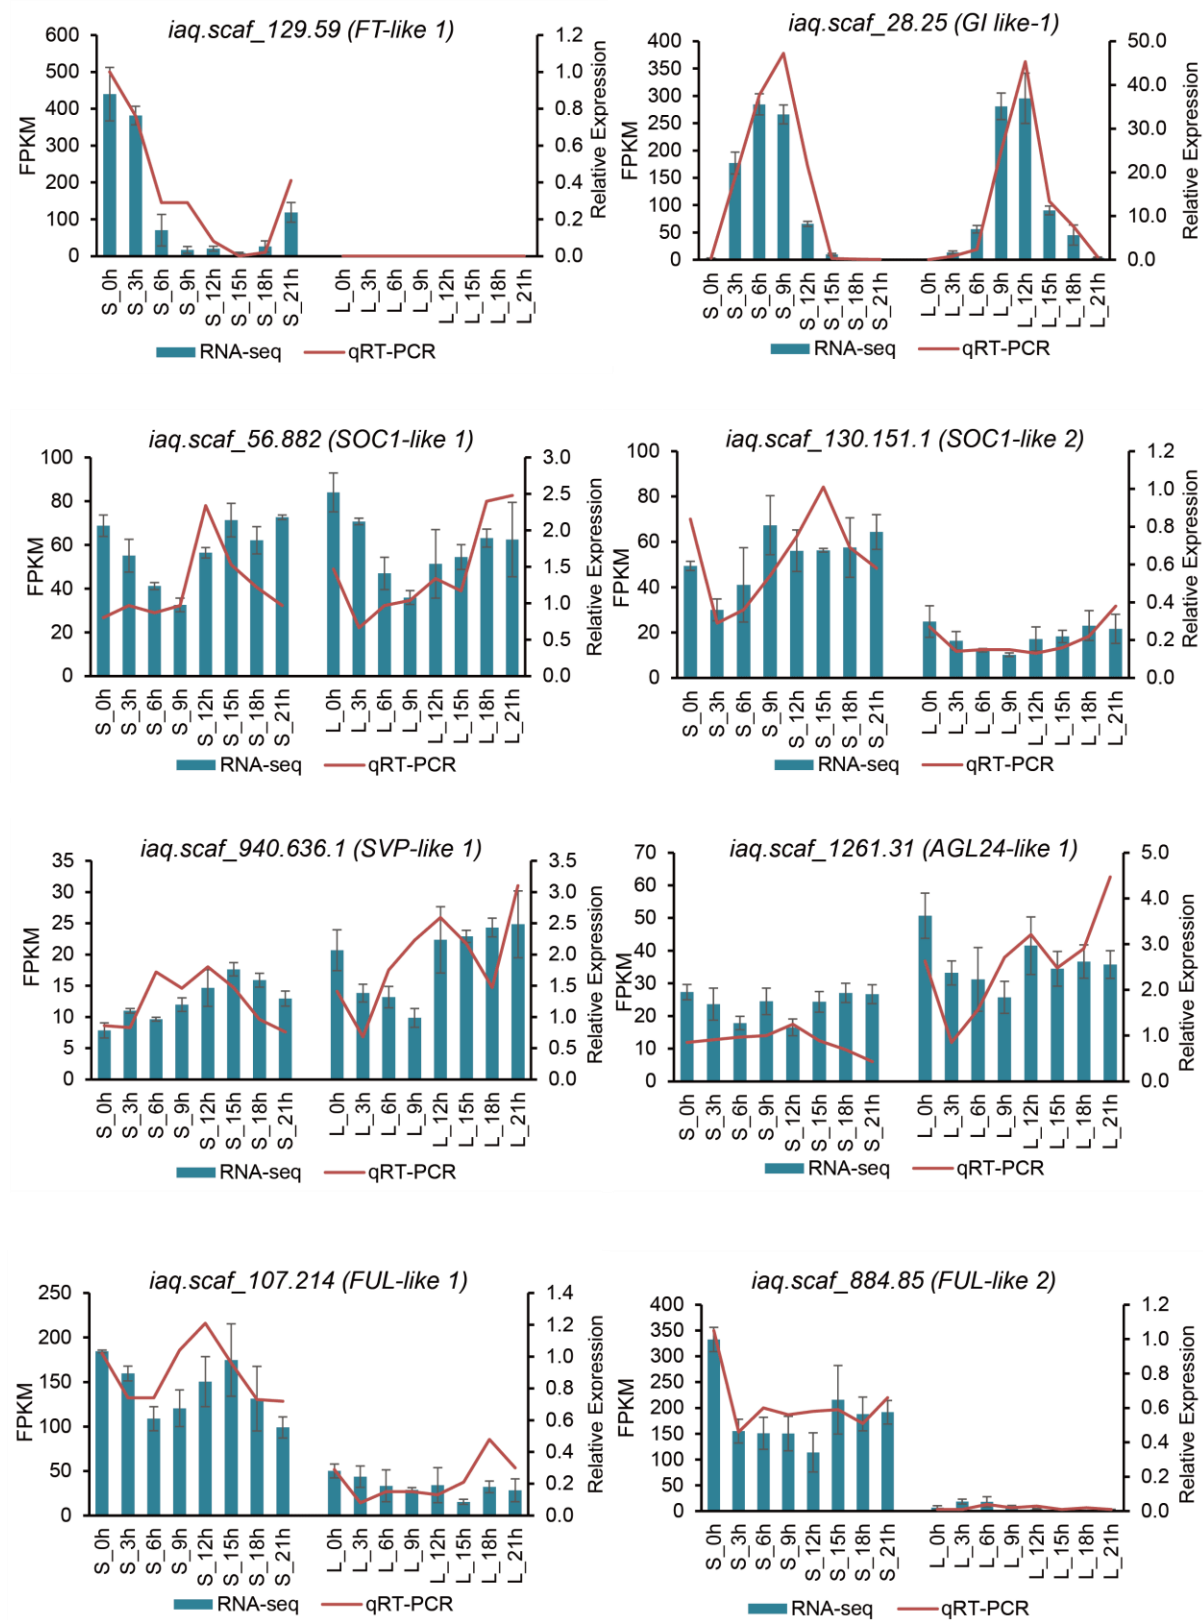

**Figure S3.** Comparative analysis of expression results between RNA-Seq and qRT-PCR for 8 flowering-related genes. Error bars represent standard deviation. S indicated short day; L indicated long day.

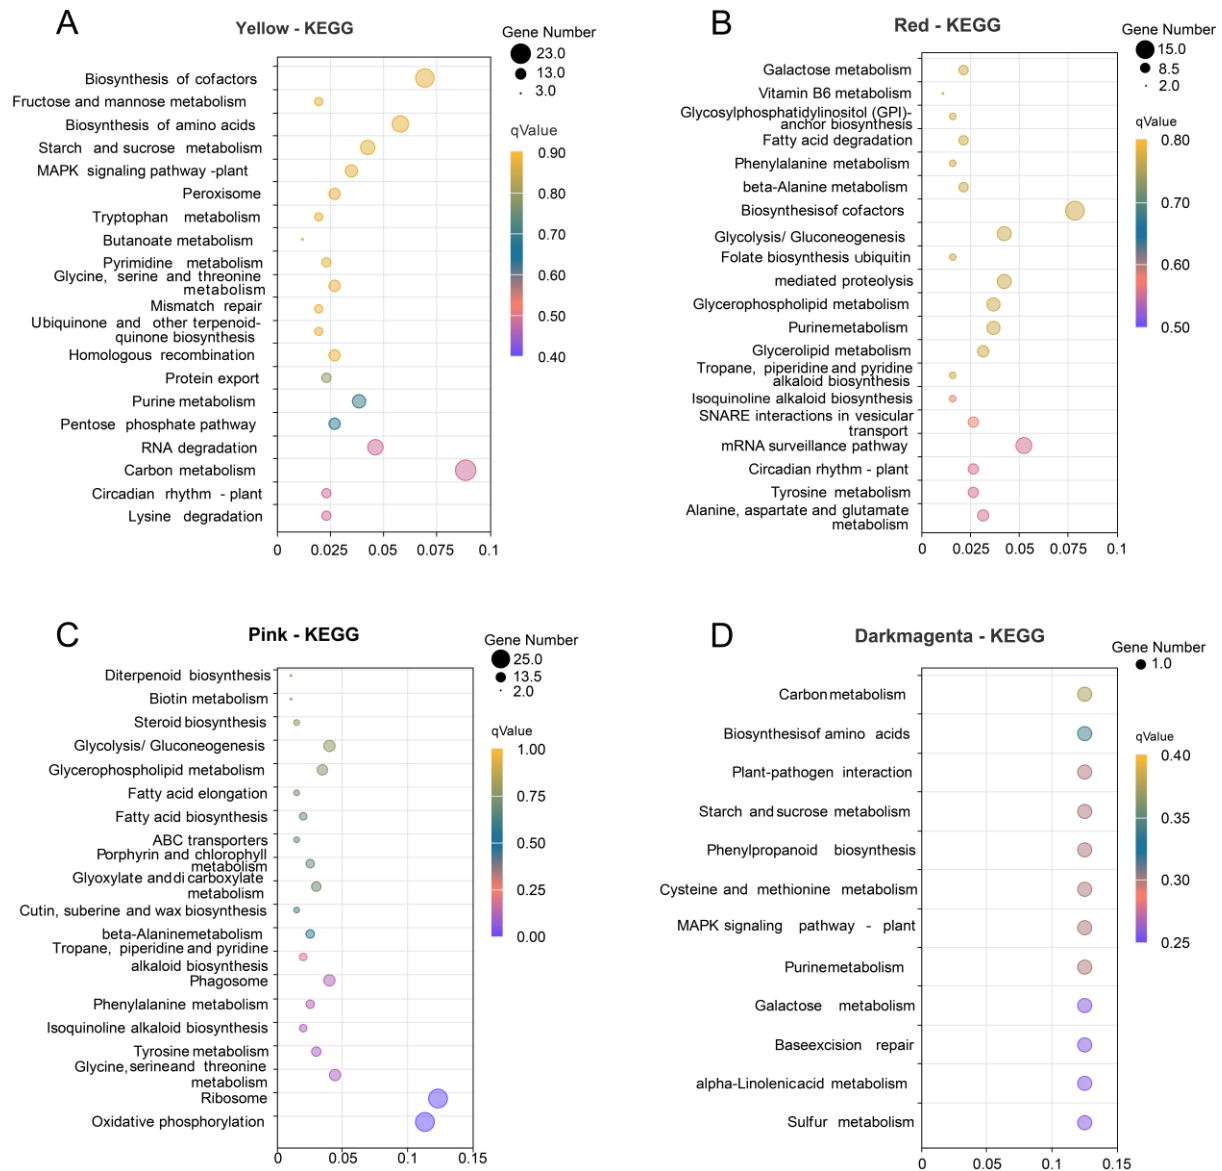

**Figure S4.** KEGG enrichment analysis in the four modules. A: yellow module; B: red module; C: pink module; D: darkmagenta module. . S indicated short day; L indicated long day.

**Supplementary Table S1: The primer information for qRT-PCR**

| Gene ID                                   | Primer name | Primer sequence (5'-3') | Product size (bp) |
|-------------------------------------------|-------------|-------------------------|-------------------|
| iaq.scaf_17.368(GAPDH)                    | GAPDH-F     | CACTGTCCGAACTGAGAA      | 136               |
|                                           | GAPDH-R     | GCAATCACCAACGAAGTC      |                   |
| iaq.scaf_129.1643_iaq.scaf_129.1644(CCA1) | CCA1-F      | TTGTTGAAGCCTTGAAGTTGT   | 142               |
|                                           | CCA1-R      | CCATCACCATCATTGCCC      |                   |
| iaq.scaf_51.23(LHY)                       | LHY-F       | ACTCTATGGGCGGGCTTG      | 181               |
|                                           | LHY-R       | CGGTTTCCTCTTTGGTCGT     |                   |
| iaq.scaf_884.166.1(TOC1)                  | TOC1-F      | TCTCGCAACAAAGGATGGA     | 118               |
|                                           | TOC1-R      | CTTGGAATGTAATACGGTGGAT  |                   |
| iaq.scaf_9.675(CO_1)                      | CO_1-F      | AAGACGACGAAGACGAAGC     | 181               |
|                                           | CO_1-R      | GGGACAAAGTAATGGTGCG     |                   |
| iaq.scaf_129.59(FT_1)                     | FT_1-F      | CAGGAATGGGTATGAGATGAGG  | 129               |
|                                           | FT_1-R      | GGAGAGGCTGGGTTTGGA      |                   |
| iaq.scaf_28.25(GI_1)                      | GI_1-F      | GAACAATGGTCCACTCGCT     | 164               |
|                                           | GI_1-R      | TCCACTGACTTCACTAACTGCC  |                   |
| iaq.scaf_1261.31(AGL24_1)                 | AGL24_1-F   | GCTCGCCCTCATCGTCTT      | 177               |
|                                           | AGL24_1-R   | ATTTCCCTTGCTCAGTCTCACAT |                   |
| iaq.scaf_56.882(SOC1_1)                   | SOC1_1-F    | GTCTGTGCTGTGTGATGCTGA   | 158               |
|                                           | SOC1_1-R    | CCTGTTCTTGTTCCACTGATG   |                   |
| iaq.scaf_130.151.1(SOC1_2)                | SOC1_2-F    | GCGACAAGCAGACAGGTGA     | 111               |
|                                           | SOC1_2-R    | GGGAGAGAAGATGATGAGAGC   |                   |
| iaq.scaf_107.214(FUL_1)                   | FUL_1-F     | AGAAAAAGGACAGAGCATTGAA  | 140               |
|                                           | FUL_1-R     | TGGAACATAGGAAGATGAGGAG  |                   |
| iaq.scaf_884.85(FUL_2)                    | FUL_2-F     | CCTCCTATGTTGTGCCGC      | 101               |
|                                           | FUL_2-R     | CTGACGCTGAGTTCCTTCTG    |                   |
| iaq.scaf_940.636.1(SVP_1)                 | SVP_1-F     | GTCTGTGCTGTGCGATGC      | 105               |
|                                           | SVP_1-R     | TTCCGTCTTTCAAGTATTCCC   |                   |
